## 1 Conserved Circuits for Direction Selectivity in the Primate Retina

2 Sara S. Patterson<sup>1,2,\*</sup>, Briyana N. Bembry<sup>2</sup>, Marcus A. Mazzeferri<sup>2</sup>, Maureen Neitz<sup>2</sup>, Fred Rieke<sup>3</sup>,  
3 Robijanto Soetedjo<sup>3,4</sup>, Jay Neitz<sup>2,\*</sup>

4  
5 <sup>1</sup> Center for Visual Science, University of Rochester, Rochester, NY, 14620

6 <sup>2</sup> Department of Ophthalmology, University of Washington, Seattle, WA, 98109

7 <sup>3</sup> Department of Physiology and Biophysics, University of Washington, Seattle, WA, 98195

8 <sup>4</sup> Washington National Primate Research Center, University of Washington, Seattle, WA, 98195

9 \* Correspondence: [spatte16@ur.rochester.edu](mailto:spatte16@ur.rochester.edu), [jneitz@uw.edu](mailto:jneitz@uw.edu)

10  
11 **The detection of motion direction is a fundamental visual function and a classic model for**  
12 **neural computation<sup>1,2</sup>. In the non-primate mammalian retina, direction selectivity arises in**  
13 **starburst amacrine cell (SAC) dendrites, which provide selective inhibition to ON and ON-**  
14 **OFF direction selective retinal ganglion cells (dsRGCs)<sup>3,4</sup>. While SACs are present in**  
15 **primates<sup>5</sup>, their connectivity is unknown and the existence of primate dsRGCs remains an**  
16 **open question. Here we present a connectomic reconstruction of the primate ON SAC**  
17 **circuit from a serial electron microscopy volume of macaque central retina. We show that**  
18 **the structural basis for the SAC's ability to compute and confer directional selectivity on**  
19 **post-synaptic RGCs<sup>6</sup> is conserved in primates and that SACs selectively target a single**  
20 **ganglion cell type, a candidate homolog to the mammalian ON-sustained dsRGCs that**  
21 **project to the accessory optic system and contribute to gaze-stabilizing reflexes<sup>7,8</sup>. These**  
22 **results indicate that the capacity to compute motion direction is present in the retina, far**  
23 **earlier in the primate visual system than classically thought, and they shed light on the**  
24 **distinguishing features of primate motion processing by revealing the extent to which**  
25 **ancestral motion circuits are conserved.**

26  
27 Neurons responding preferentially to motion in specific directions are found across species and  
28 throughout the visual system<sup>1,2</sup>. The underlying mechanisms have been extensively studied in  
29 ON and ON-OFF dsRGCs of the non-primate mammalian retina<sup>9</sup>. Each consists of multiple  
30 subtypes preferring motion in different directions<sup>10</sup>. Their direction selectivity begins with SACs,  
31 radially-symmetric interneurons present in every mammalian retina studied to date<sup>5,11</sup>. SAC  
32 dendrites operate independently, computing outward motion from the soma<sup>12</sup> and providing  
33 selective GABAergic inhibition to dsRGC subtypes preferring motion in the opposite direction<sup>3,4</sup>.

34 The intensive study of direction selective retinal circuits has yielded significant insight into  
35 the general principles of neuronal computation<sup>1</sup>, yet the direct applications to primate vision are  
36 unclear. Despite being a standard feature in the early visual systems of other species, direction  
37 selectivity has yet to be demonstrated in the primate retina. Several lines of evidence indicate  
38 some retinal capacity to compute motion direction may be conserved<sup>13-15</sup>, yet primate dsRGCs  
39 remain elusive. As such, a classic interpretation is that the expanded primate cortex replaced the  
40 need for retinal direction selectivity and the other highly-specialized computations found in non-  
41 primate retinal ganglion cells (RGCs)<sup>16,17</sup>. Alternatively, the absence of primate dsRGCs from the  
42 literature could reflect a sampling bias. The primate retina is dominated by three RGC types and  
43 the rarity of the other ~15 anatomically-defined types severely limits the possibility of identifying  
44 dsRGCs with the electrophysiology approaches used in other species<sup>9,18</sup>. Thus, the underlying  
45 question is not only whether primate dsRGCs exist, but also how to find them.

46 An alternative strategy is to identify candidate dsRGCs from the neurons post-synaptic to  
47 SACs. However, this approach is currently limited by a lack of information on primate SAC  
48 circuitry. Here we use serial block-face scanning electron microscopy and connectomics<sup>19</sup> to fill  
49 this gap in knowledge and determine the extent to which the mammalian retinal direction  
50 selectivity circuitry is conserved in primates.

51

## 52 **Connectomic Reconstruction of ON SACs**

53 We reconstructed a population of 8 ON SACs from a 220 x 220 x 170  $\mu\text{m}$  volume of macaque  
54 central retina ( $\sim 1.5$  mm inferior to the fovea) sectioned horizontally at 90 nm and imaged at 7.5  
55 nm/pixel (see **Methods**)<sup>20</sup>. The volume spanned from the photoreceptor outer segments to the  
56 ganglion cell layer, enabling 3D reconstruction of complete retinal circuits while maintaining the  
57 resolution necessary to identify synapses. Each reconstructed ON SAC exhibited the stereotyped  
58 morphological features and stratification described across species (**Fig. 1**)<sup>5</sup>. We focused on the  
59 ON SACs because primate OFF SACs are nearly absent from the fovea and outnumbered 10:1  
60 by ON SACs in the periphery<sup>5,21</sup>. Consistent with previous reports of primate SACs, the dendritic  
61 fields in **Fig. 1** are sparse compared to non-primate SACs, both in branching density and coverage  
62 factor<sup>5</sup>.

63 Direction selectivity in dsRGCs depends critically on SACs<sup>11</sup>. To determine whether  
64 primate ON SACs are well-suited to play a similar role, we investigated the structural basis for  
65 two features essential to this role: centrifugal motion tuning and asymmetric inhibition of post-  
66 synaptic neurons<sup>6</sup>. SACs are ideal for connectomic analysis as decades of careful study in other  
67 species has detailed the incredibly precise relationships between their anatomy, physiology and  
68 function<sup>6</sup>. We began with the SACs' selectivity for outward motion, which is supported by cell-  
69 intrinsic mechanisms (morphology and radial synapse distribution<sup>22,23</sup>) and amplified by circuit-  
70 level mechanisms (temporally-diverse excitatory bipolar cell input<sup>24,25</sup> and SAC-SAC lateral  
71 inhibition)<sup>26,27</sup>. While the relative contributions of these and other mechanisms remains an active  
72 area of investigation<sup>2,6</sup>, together they provide a solid blueprint to begin our connectomic  
73 investigation. If primate SACs confer direction selectivity on downstream RGCs, we expect to find  
74 evidence for these mechanisms.

75 We first asked whether the proximal-distal synaptic gradient supporting direction  
76 selectivity in mammalian SAC dendrites is also present in primates. As expected, the SACs'  
77 output synapses were confined to varicosities on the distal dendrites while bipolar cell input was  
78 located closer to the soma, often at the small spines extending from the thin proximal dendrites  
79 (**Fig. 1d-f**). This distribution of excitatory input and synaptic output, combined with the SAC's  
80 characteristic morphology, is critical for centrifugal motion tuning<sup>22,23</sup>.

81 SACs receive the majority of their inhibitory input from neighboring SACs<sup>22</sup> and the  
82 resulting lateral inhibition reduces sensitivity to inward motion<sup>26,27</sup>. We were able to reliably  
83 classified the pre-synaptic amacrine cells as SACs or non-SACs for 54 of 63 inhibitory synaptic  
84 inputs to the SAC in **Fig. 1e** and confirm that 60.38% came from other ON SACs. Interestingly,  
85 the exact location of inhibitory input along each SAC dendrite varies between species and is  
86 hypothesized to scale with eye size to preserve angular velocity tuning<sup>22</sup>. SACs in species with  
87 larger eyes have greater inter-soma distances and receive inhibition from other SACs more  
88 distally. The macaque eye size of 200  $\mu\text{m}/\text{degree}$  of visual angle<sup>28</sup> is consistent with the low SAC  
89 coverage factor<sup>5</sup> and our observed bias of inhibitory synaptic input to the distal dendrites (**Fig. 1a**,

90 **1e-f**). These results demonstrate SAC-SAC lateral inhibition is present in primates and positioned  
91 to compute a behaviorally-relevant measure of motion direction.

92 Lastly, we investigated the “space-time wiring” hypothesis<sup>24</sup>, which proposes that  
93 sustained bipolar cell input is located closer to the soma than transient bipolar cell input. The  
94 resulting temporally-diverse excitation sums for centrifugal, but not centripetal, motion<sup>24,25</sup>;  
95 although this mechanism remains controversial<sup>16,22,23</sup>. We reconstructed the axon terminals of  
96 presynaptic bipolar cells and classified each as either ON midget, DB4 diffuse, or DB5 diffuse  
97 (**Fig. 2a, 2d-f**). The “space-time wiring” hypothesis predicts that midget bipolar cells will be closest  
98 to the soma as their responses are more sustained than diffuse bipolar cells<sup>29</sup>. To test this  
99 prediction, we calculated the radial distance from the SAC’s soma to each bipolar cell synaptic  
100 input. Indeed, ON midget bipolar cells were significantly closer to the soma than the diffuse bipolar  
101 cells (**Fig. 2b-c**). However, the underlying distributions show substantial overlap between the two  
102 groups. Thus, our results mirror those in other species – while we find evidence for space-time  
103 wiring, the overall efficacy could be reduced by the lack of spatial segregation between bipolar  
104 cell types<sup>22</sup>.

105 Taken together, our investigation of the structure and synaptic input to ON SACs revealed  
106 that multiple mechanisms contributing to centrifugal motion tuning in mammalian SACs are  
107 conserved in primates. However, the SAC’s ability to confer direction selectivity depends not only  
108 on their responses to outward motion, but also their selective wiring with specific dsRGC  
109 subtypes. To address this, we next asked which RGCs were post-synaptic to the ON SACs and  
110 whether they received asymmetric SAC inhibition.

111

### 112 **SAC Synaptic Output to RGCs**

113 SAC output synapses have a highly distinctive ultrastructure with large synaptic contacts where  
114 the SAC’s processes completely engulf the postsynaptic dendrite<sup>3,21,30,31</sup>. We frequently observed  
115 these stereotyped “wrap-around” synapses at the varicosities of distal SAC dendrites (**Fig. 3b**).  
116 We mapped each output synapse, then reconstructed and classified the postsynaptic neurons  
117 (**Fig. 3a**). As expected, the SACs’ output targeted other SACs and non-SAC amacrine cells, but  
118 rarely bipolar cells. Crucially, RGCs received the majority of the SACs’ output.

119 Amazingly, we found the ON SAC’s synaptic output targeted a single RGC type with  
120 striking selectivity (**Fig. 3f**). The RGC’s morphology matches the recursive monostratified RGC  
121 (rmRGC), a rarely-encountered neuron described only in the largest anatomical surveys of  
122 primate RGCs<sup>18,32</sup>. Although the rmRGC’s physiology and connectivity are unknown, a role in  
123 direction selectivity has been proposed before on the basis of their strong resemblance to the  
124 highly stereotyped morphology of ON-sustained dsRGCs in other vertebrates<sup>33–35</sup>. The recursive,  
125 looping branching pattern that ON dsRGCs share with rmRGCs is attributed to their co-  
126 fasciculation with the SAC plexus<sup>36,37</sup>. We observed similar co-stratification and co-fasciculation  
127 between the rmRGC and ON SACs (**Fig. 3d-e**).

128 Because each SAC dendrite is independently tuned to outward motion, the directionality  
129 of SAC inhibition can be predicted from the angle of the vector between the soma and each output  
130 synapse<sup>3,31,38,39</sup>. To estimate the rmRGC’s direction selectivity, we calculated this for **135** of the  
131 rmRGC’s conventional synaptic inputs where a presynaptic SAC could be sufficiently  
132 reconstructed (**Fig. 3g**). Because the SAC’s output is inhibitory, the rmRGC is predicted to prefer  
133 motion in the opposite direction of the strong bias shown in **Fig. 3h**. The distribution of dendritic

134 angles was highly non-uniform ( $p < 0.0001$ ; Rayleigh test), indicating the asymmetric SAC  
135 inhibition necessary for direction selectivity is present.

136 To confirm our findings, we next searched for additional rmRGCs. The dendritic fields of  
137 ON dsRGCs tuned to the same direction tile while those tuned to different directions overlap<sup>39,40</sup>,  
138 predicting additional rmRGCs should be present within the first rmRGC's dendritic field. Indeed,  
139 we found additional rmRGCs, both in the first volume taken from the inferior retina and in a  
140 separate volume of central nasal retina, each exhibiting the same characteristic morphology,  
141 stratification and stereotyped SAC input (**Fig. 3i, S1**). The dendrites of overlapping rmRGCs were  
142 often directly adjacent, consistent with mammalian ON dsRGCs' cofasciculation with each other  
143 and the ON SAC plexus<sup>39,40</sup> (**Fig. 3i-j**). Moreover, puncta adherens were frequently observed  
144 between adjacent rmRGC dendrites, a unique feature previously reported in rabbit ON dsRGCs<sup>30</sup>  
145 (**Fig. S2**).

146 While the other rmRGCs' proximity to the volume's edge prevented an unbiased dendritic  
147 angle analysis, we did observe a striking trend: the SAC dendrites providing input to the first  
148 rmRGC rarely, if ever, synapsed on the second rmRGC in **Fig. 3j**, despite frequently being in  
149 close proximity. For example, the SAC in **Fig. 3e** synapsed on the first rmRGC 40 times, but only  
150 three times on the second rmRGC (**Fig. S3**). These results are consistent with the hypothesis that  
151 the overlapping rmRGCs prefer movement in different directions and supports asymmetric  
152 inhibition from SACs as an underlying mechanism for their distinct directional tuning. Taken  
153 together, the rmRGC's structure and circuitry is consistent with ON dsRGCs in other species.

154

### 155 **Retinal Input to the AOS**

156 Like SACs, ON dsRGCs play a fundamental and highly conserved role in vision<sup>41</sup>. From mice and  
157 rabbits to turtles and birds, ON dsRGCs share not only the characteristic morphology shown in  
158 **Fig. 3c**, but also projections to the AOS, which coordinates with the vestibular system to stabilize  
159 gaze with the optokinetic reflex<sup>34,35,42,43</sup>. As in other species, neurons in the primate AOS exhibit  
160 similar response properties to ON dsRGCs<sup>42,44</sup> and receive direct retinal input<sup>45</sup>, yet the specific  
161 RGC types are unknown. Previous retrograde tracer injections to the nucleus of the optic tract  
162 and dorsal terminal nucleus (NOT-DTN) complex of the AOS revealed input from two RGC types,  
163 one resembling the rmRGC<sup>46</sup>; however, incompletely-filled dendritic fields prevented  
164 unambiguous classification. We repeated this experiment with the goal of targeting individual  
165 RGCs for detailed morphological characterization and comparison to our reconstructions.

166 We injected the retrograde tracer rhodamine dextran into the NOT-DTN<sup>47</sup>, which was  
167 located by identifying neurons with characteristic response properties, including direction  
168 selectivity during horizontal smooth pursuit (**Fig. 4a, S4a**). Further confirmation was obtained with  
169 post-mortem histology (**Fig. S4b**). Retrogradely-labeled RGCs were identified in an *ex vivo*  
170 flatmount preparation by clumps of rhodamine fluorescence within their soma (**Fig. 4b**) and filled  
171 with fluorescent dye to reveal their dendritic field structure (**Fig. 4c-d, S5**). All were rare wide-field  
172 RGCs and a subset exhibited the characteristic curving dendrites that are hallmarks of both  
173 rmRGCs and ON dsRGCs, confirming the NOT-DTN of the AOS receives direct rmRGC input.

174

### 175 **Discussion**

176 Here, we identified a likely homolog to the ON dsRGC, establishing an anatomically-conserved  
177 circuit from SACs to the AOS for the gaze-stabilizing, compensatory eye movements essential for  
178 visually-guided navigation<sup>42</sup>. Past research on the primate AOS has largely focused on the role

179 of cortical feedback; however, recent studies on human congenital nystagmus suggest a direct  
180 retinal contribution involving GABAergic signaling by SACs<sup>13,14,48</sup>. Until now, the RGCs linking  
181 SACs to the AOS were unknown.

182 We estimate that rmRGCs make up ~1% of all RGCs in the central retina. This rarity likely  
183 reflects their large dendritic fields (**Fig. S6**) rather than their importance in vision. The low density  
184 of rmRGCs undoubtedly creates a challenging sampling bias that could explain their absence in  
185 surveys recording from single RGCs with microelectrodes or relatively small patches of peripheral  
186 retina with multielectrode arrays. Although follow-up physiological studies guided by our results  
187 will be important, waiting for these experiments to become feasible delays essential insights into  
188 primate vision. Here we demonstrate that connectomics – a technique best known for large-scale  
189 dense reconstructions<sup>24,39,49</sup> – can also be utilized for focused, hypothesis-driven questions about  
190 otherwise intractable neural circuits<sup>19</sup> with implications for human health and disease<sup>13,14,48</sup>.

191 Interestingly, we did not observe SAC input to a ON-OFF dsRGC homolog, although we  
192 cannot rule out the possibility that they are present in the peripheral retina where OFF SAC density  
193 increases. However, the central retina mediates most conscious vision, indicating any ON-OFF  
194 dsRGC homolog confined to the periphery would be best suited for non-image-forming vision and  
195 independent of the cortical direction selectivity underlying motion perception<sup>50</sup>.

196 This work underscores the benefits of bridging primate and non-primate research<sup>16</sup>. The  
197 SAC and rmRGC join a growing list of primate retinal neurons, like the intrinsically photosensitive  
198 RGCs, that are understood only through prior research in non-primate species. The strong  
199 correspondence between rmRGCs and ON dsRGCs raises the intriguing possibility that other  
200 rare primate RGCs with unknown functions may have well-studied non-primate counterparts.  
201 More generally, this challenges a widely-held view that the computational goals of the primate  
202 retina are unique from other species and maximize information transmission to the cortex rather  
203 than extraction of meaningful visual features, such as motion direction.

204 **Acknowledgements**

205 We are grateful to James Kuchenbecker and James Anderson for IT support, Andrea Bordt and  
206 Rebecca Girresch for annotation assistance and Chris Chen and Michelle Giarmarco for  
207 assistance with tissue preparation. We also thank Shellee Cunningham, Ed Parker and Jessica  
208 Rowlan for excellent technical assistance. Tissue was provided by the Tissue Distribution  
209 Program at the Washington National Primate Research Center with the help of Chris English. This  
210 work was supported by NIH grants R01-EY027859 (J.N.), R01-EY028902 (R.S.), F32-EY032318  
211 (S.P), T32-EY007125 (S.P), T32-EY007031 (S.P), P30-EY014800, P51-OD010425 and  
212 Research to Prevent Blindness. Implementation of the Viking software environment for image  
213 capture, registration, database, and annotation was supported through NIH grants to Bryan  
214 William Jones (R01-EY015128, R01-EY028927).

215 **Author Contributions**

216 S.P. conceived of the project, wrote the paper and performed the serial EM experiments. J.N.,  
217 S.P., F.R. and R.S. designed experiments. J.N. edited the paper. J.N and M.N acquired the serial  
218 EM volume. B.B. and R.S. performed the retrograde tracer injections. F.R. and S.P. performed  
219 the cell fills. B.B., M.M. and S.P performed the immunohistochemistry and confocal microscopy.

220 **Competing Interests**

221 The authors have no competing interests to disclose.

222 FIGURES

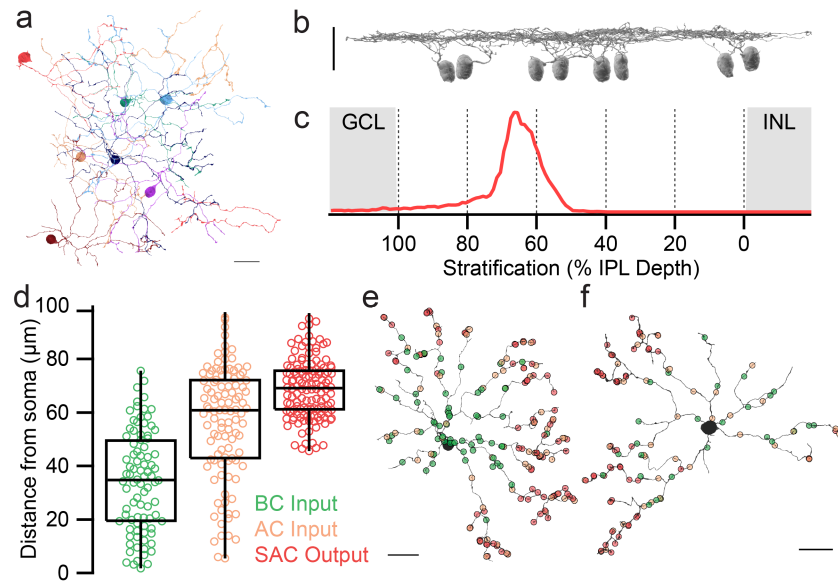

223  
224  
225  
226  
227  
228  
229

**Figure 1 | ON SACs of the primate retina.** **a**, 3D reconstructions of representative ON SACs and isolated ON SAC dendrites. **b**, Side view of 8 ON SAC reconstructions. **c**, ON SAC stratification depth in the inner plexiform layer (IPL),  $67.6 \pm 11.0\%$  (mean  $\pm$  s.d.,  $n = 8$  SACs). **d**, Distance from the soma for each synapse type from 2 ON SACs. **e-f**, Locations of ribbon input, conventional input and output synapses along two ON SAC's dendritic fields. All scale bars are  $20 \mu\text{m}$ .

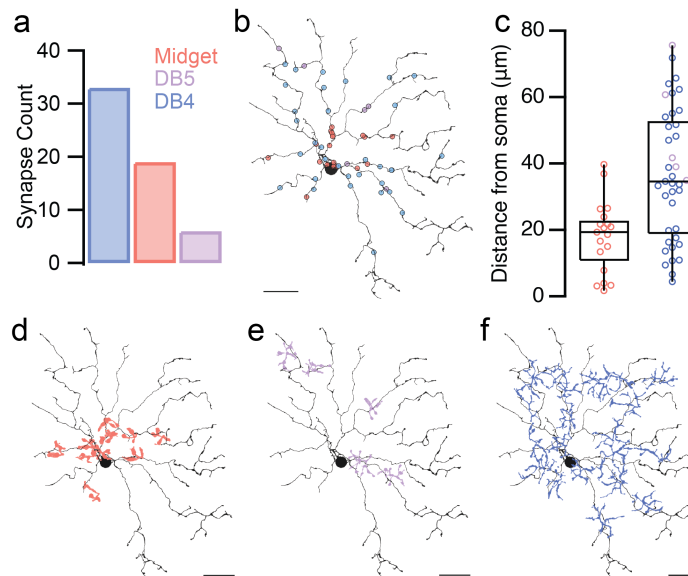

230  
231  
232  
233  
234  
235

**Figure 2 | Bipolar input to ON SACs.** **a**, Frequency of bipolar cell types presynaptic to ON SACs. **b**, Locations of ribbon synaptic input to an ON SAC, colored by bipolar cell type. **c**, Distance from the soma for ON midget and diffuse (DB4 and DB5) bipolar cells ( $17.94 \pm 2.47 \mu\text{m}$  vs.  $36.72 \pm 3.17 \mu\text{m}$ , mean  $\pm$  s.d.,  $p = 0.0011$ ). **d-f**, 3D reconstructions of presynaptic axon terminals of ON midget, DB4 diffuse and DB5 diffuse bipolar cells, respectively. All scale bars are  $20 \mu\text{m}$ .

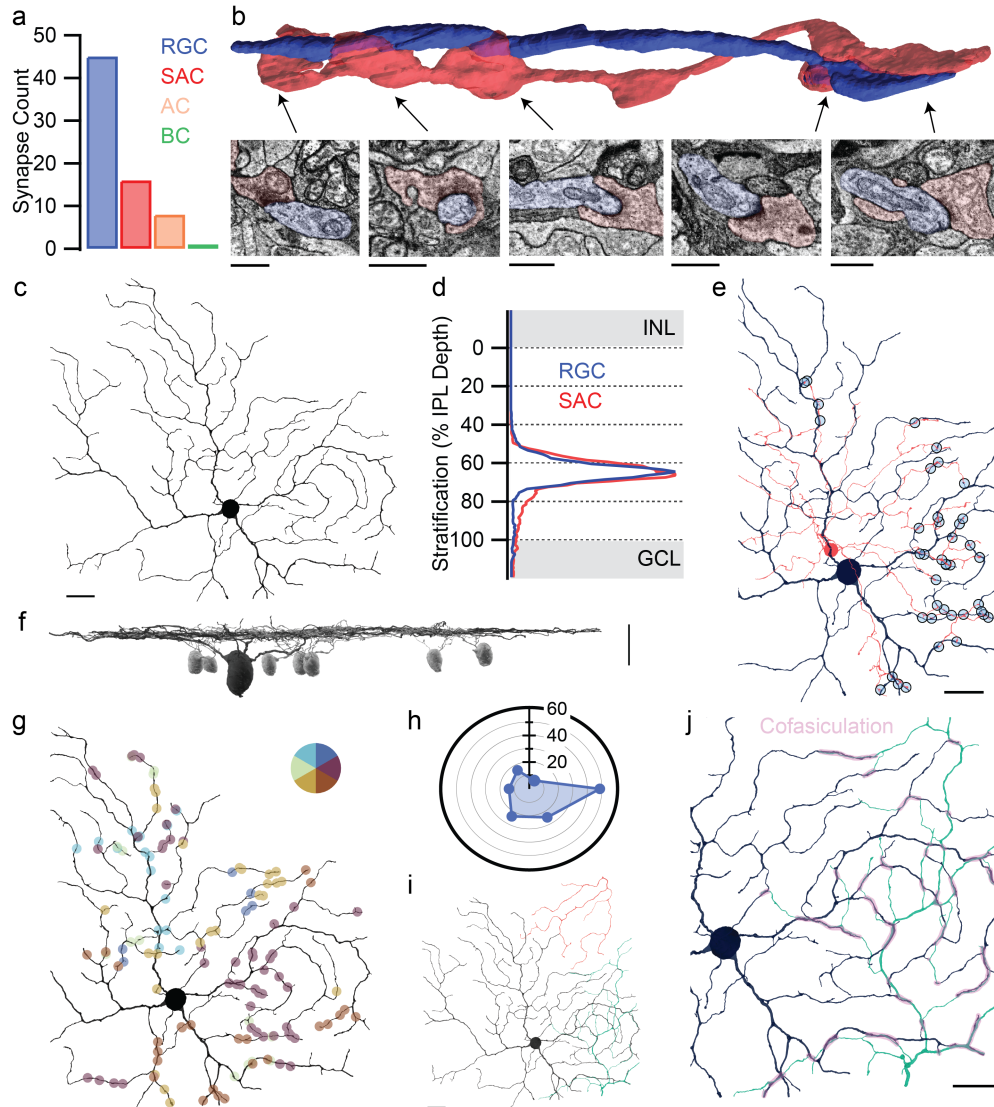

236

237

238

239

240

241

242

243

244

245

246

**Figure 3 | ON SAC synaptic output to RGCs.** **a**, Frequency of SAC output to RGCs, SACs, non-SAC amacrine cells and bipolar cells. **b**, 3D reconstruction of representative “wrap-around” synapses between an ON SAC and RGC dendrites. EM micrographs show five distinct synapses between the two cells. **c**, 3D reconstruction of the RGC in **3a-b**. **d**, Co-stratification profile of the rmRGC with the ON SACs from **1b**. **e**, Light blue markers show locations of synapses between the ON SAC and RGC. Note the co-fasciculation between the two cells. **f**, Side view of the RGC in **3c** with ON SACs (light gray). **g**, Locations of SAC synaptic input to the rmRGC, colored by dendritic angle. **h**, Polar histogram of dendritic angles for the synapses depicted in **3g**. **i**, Population of three rmRGCs. **j**, Co-fasciculation of overlapping rmRGCs. Scale bars in **3b** are 1  $\mu\text{m}$ , the rest are 20  $\mu\text{m}$ .



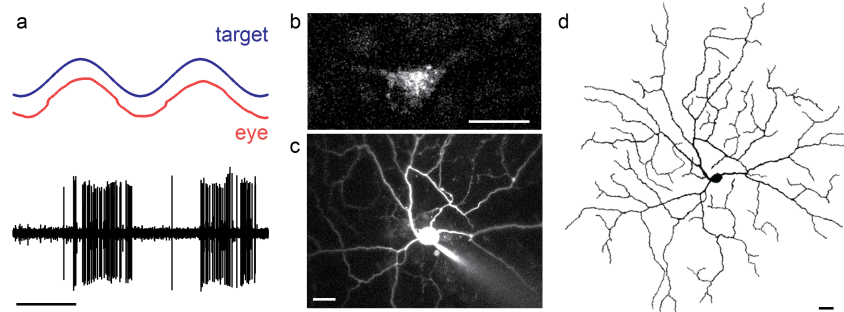

247

248

249

250

251

252

**Figure 4 | Retrograde labeling of RGCs projecting to the NOT-DTN. a**, Direction-selective response properties recorded from the NOT-DTN to horizontal smooth pursuit. Scale bar is 1 second. **b**, RGC soma identified by fluorescent rhodamine dextran granules. **c**, Cell fill of rhodamine-labeled RGC, electrode to the bottom left. **d**, Tracing of the dendritic field in **4c**, omitting the axon. Scale bars in **b-d** are 20  $\mu\text{m}$ .

253 **SUPPLEMENTARY FIGURES**

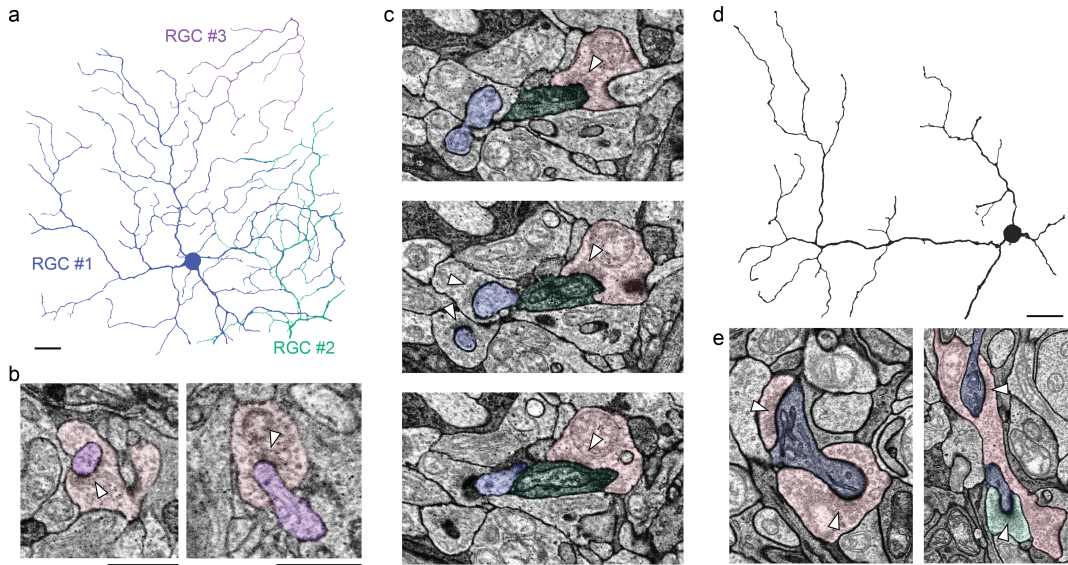

254  
255 **Figure S1 | Additional rmRGCs with characteristic “wrap-around” SAC synaptic input.** **a**,  
256 Dendritic fields of three rmRGCs in the first serial EM volume. **b**, EM micrographs of SAC (pink)  
257 input to rmRGC #3 (purple). **c**, EM micrograph series of SAC input to rmRGC #2 (green). Note  
258 input from other SACs to nearby rmRGC #1 (blue). **d**, Partial reconstruction of an rmRGC from a  
259 second serial EM volume of nasal retina. **e**, EM micrographs of the characteristic “wrap-around”  
260 synapses from SACs (pink, green) onto the rmRGC (blue). Scale bars in **a** and **d** are 20 µm, the  
261 rest are 1 µm.

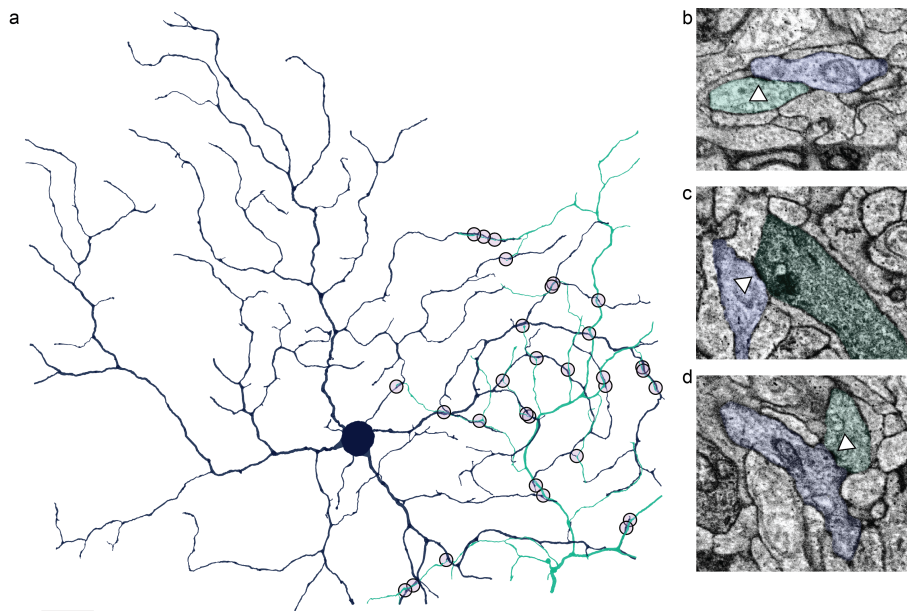

262  
263 **Figure S2 | Additional identifying features of recursive monostratified RGCs.** **a**, Markers  
264 indicate the locations of all puncta adherens between the two primary rmRGCs in **Fig. 4j**. Scale  
265 bar is 20 µm. **b-d**, Representative EM micrographs of puncta adherens, symmetric membrane  
266 densities without synaptic specialization<sup>30</sup>.

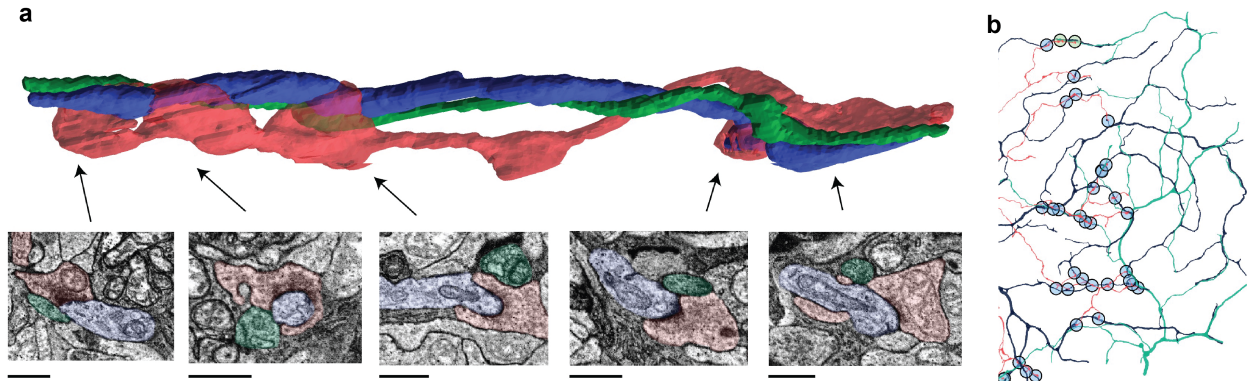

267  
268  
269  
270  
271

**Figure S3 | Lack of shared SAC input between overlapping rmRGCs.** **a**, As in **Fig. 3b**, but with the 2<sup>nd</sup> rmRGC from **Fig. 3j** added in green. Note the close proximity to the first rmRGC and SAC, but lack of input from the SAC. Scale bars are 1  $\mu$ m. **b**, As in **Fig. 3e**, but with synapses onto the 2<sup>nd</sup> rmRGC marked in green.

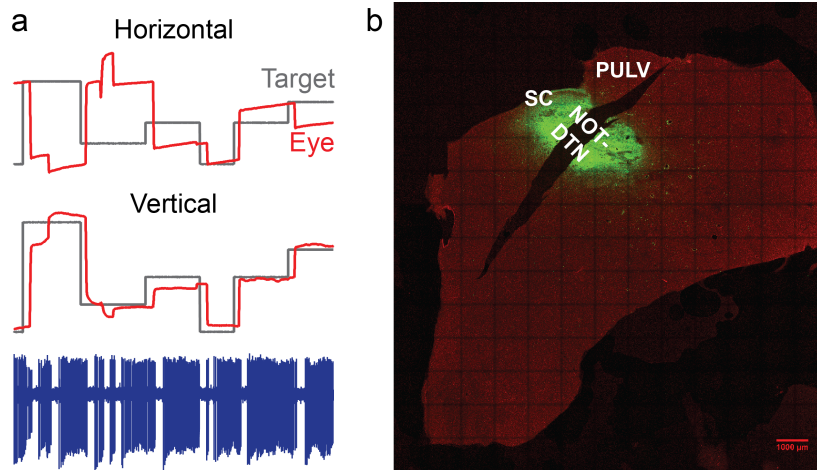

272  
273  
274  
275  
276  
277

**Figure S4 | Additional verification of NOT-DTN injection site.** **a**, FOPN recorded while confirming the boundaries of the NOT-DTN, adjacent to the area where directionally-selective neurons were encountered. Scale bar is 1 second. **b**, Injection site. Rhodamine fluorescence (green) marks the injection site relative to the left superior colliculus (SC) and pulvinar (PULV), DAPI (red) labels all nuclei. Scale bar is 1 mm.

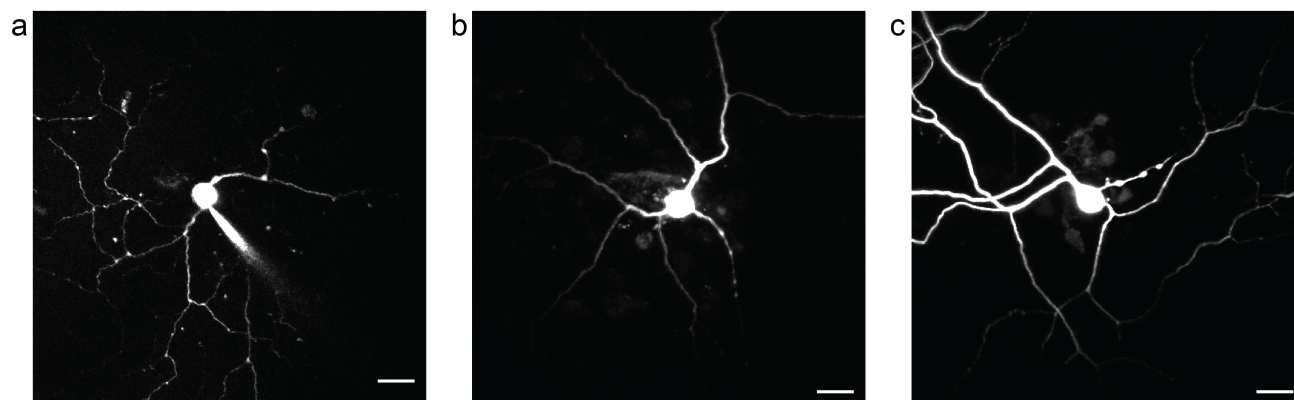

278  
279 **Figure S5 | Additional retrogradely-labeled RGCs. a,** Another recursive monostratified RGC.  
280 **b-c,** Two unidentified wide-field RGCs. All scale bars are 20  $\mu$ m.

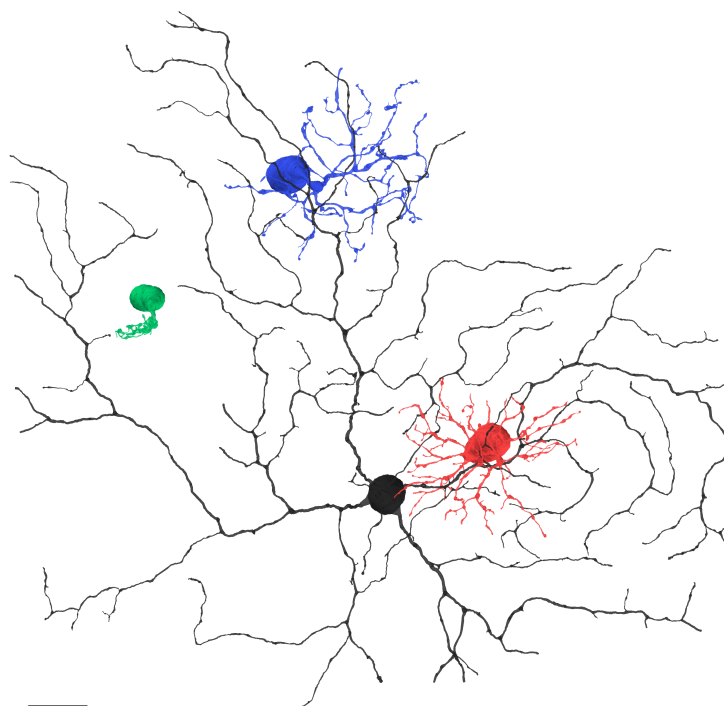

281  
282 **Figure S6 | Comparison of rmRGC dendritic field with other common primate RGCs. a,** An  
283 rmRGC dendritic field (black) compared to the three most common and well-studied primate  
284 RGCs: parasol (red), small bistratified (blue) and midget (green). Scale bar is 20  $\mu$ m.

285 **METHODS**

286 **Serial Electron Microscopy.** Retinal tissue for serial electron microscopy was obtained from a  
287 terminally anesthetized male macaque (*Macaca nemestrina*) monkey through the Tissue  
288 Distribution Program at the Washington National Primate Center. All procedures were approved  
289 by the Institutional Animal Care and Use Committee at the University of Washington. Blocks of  
290 inferior and nasal parafoveal retinal tissue at ~1 mm eccentricity from the foveal center were  
291 processed as previously described<sup>51</sup>. The inferior retinal tissue was used for all results other than  
292 **Fig. S1d-e**. A cross-section of the inferior retinal tissue taken with a transmission electron  
293 microscope can be found in our previously published work<sup>52</sup>.

294 The tissue was imaged using a Zeiss Sigma VP field emission scanning electron  
295 microscope equipped with a 3View system and sectioned in the horizontal plane. Tissue  
296 preparation and image collection were optimized in signal-to-noise ratio for visualizing small, low  
297 contrast features such as synaptic ribbons that have previously been a challenge for serial block-  
298 face scanning electron microscopy. The volume of inferior retina was imaged at a resolution of  
299 7.5 nm/pixel and contained 1893 sections at 90 nm section widths, spanning from the ganglion  
300 cell layer (GCL) through the cone pedicles. The volume of nasal retina was imaged at a resolution  
301 of 5 nm/pixel and contained 2355 sections at 50 nm section widths, spanning from the GCL to the  
302 inner nuclear layer (INL). While the size of the volume limited the number and dendritic field extent  
303 of rmRGCs and SACs that could be analyzed in detail, our reconstructions are comparable to  
304 other recent serial EM studies<sup>3,22,38</sup>.

305  
306 **Annotation.** Initial image registration was performed with Nornir (RRID: SCR\_003584,  
307 <http://nornir.github.io>) and supplemented where necessary with custom MATLAB (Mathworks)  
308 code or the SIFT feature registration plugin for ImageJ. The detailed reconstructions in **Fig. 3b**  
309 and **S3a** were annotated by contouring the neuronal processes using TrakEM2  
310 (RRID:SCR\_008954, <http://www.ini.uzh.ch/~acardona/trakem2.html>)<sup>55</sup>. All other annotation was  
311 performed with Viking (SCR\_005986, <https://connectomes.utah.edu>)<sup>53</sup>. Neuronal processes were  
312 reconstructed through the sections by placing a circular disc at the structure's center of mass and  
313 linking the disc to annotations from the same structure on neighboring sections. Synapses were  
314 annotated with lines connected by 2-3 control points and linked to a parent neuron. The synapse  
315 annotations for the presynaptic and postsynaptic neurons were also linked to each other so that  
316 the annotated neurons and the specific links between them could be represented and queried as  
317 a network.

318 We used established criteria for identifying synapses<sup>54</sup> and confirmed that the synaptic  
319 structures spanned more than one section. Conventional synapses were identified by a cluster of  
320 vesicles within the presynaptic neuron adjacent to a membrane density on the post-synaptic  
321 neuron. Ribbon synapses were identified by the presence of a ribbon structure adjacent to a  
322 membrane density on the post-synaptic neuron. The puncta adherens between rmRGC dendrites  
323 were identified as symmetrical membrane densities without any evidence of specialization for  
324 synaptic transmission<sup>30</sup>. These contacts were unlikely to be gap junctions because SBFSEM in  
325 general and our volumes specifically lack the resolution for gap junctions and none were observed  
326 along cell types known to make large gap junctions, such as All amacrine cells.

327  
328 **Cell Type Identification and Classification.** ON SACs were identified by their highly  
329 characteristic morphology, ultrastructure and stratification<sup>5,21,30</sup>. Their somas were displaced to

330 the GCL with a single primary dendrite that split into several secondary dendrites, expanding  
331 radially to stratifying in sublamina 4 (**Fig. 1**). The proximal dendrites were extremely thin while  
332 distal dendrites were covered in varicosities. To classify pre- and post-synaptic amacrine cells,  
333 each neuron was annotated until a confident classification of SAC vs. non-SAC could be made.  
334 In addition to the morphological features described above, isolated SAC dendrites were also  
335 classified by their synapses and connectivity. For distal dendrites, this included “wrap-around”  
336 synapses at varicosities, reciprocal synapses with other SACs and an absence of synaptic output  
337 to bipolar cells. For proximal dendrites, criteria included thin dendritic diameters, sparse radial  
338 branching, an absence of synaptic output sites and bipolar cell input, often at the end of short  
339 dendritic spine-like branches. Dendritic diameter and branching frequency in particular  
340 distinguished SACs from other S4 amacrine cells, such as the semilunar and wiry amacrine  
341 cells<sup>56</sup>. These morphological features reported previously and confirmed in our full SAC  
342 reconstructions served as a guide for confirming isolated branches as SACs<sup>3,22,30,31</sup>.

343 The rmRGCs were primarily identified by their characteristic curving dendrites. This  
344 dendritic field structure is similar to that of the recursive bistratified RGC; however, the recursive  
345 bistratified RGC dendrites frequently change strata and, as a result, often overlap when viewed  
346 in a flatmount. Overlapping dendrites were rarely observed with the rmRGCs and largely limited  
347 to places where distal dendrites travelled under primary dendrites. As reported for ON dsRGCs  
348 in other species<sup>39</sup>, we occasionally observed isolated dendrites extending towards the OFF  
349 sublamina; however, these branches ended quickly and were too sparse to form a clear second  
350 dendritic tier as reported for recursive bistratified RGCs.

351 We classified the ON bipolar cells presynaptic to SACs and rmRGCs into four types – ON  
352 midget, giant, DB4 and DB5 – following previous serial EM classifications<sup>57</sup>. ON midget bipolar  
353 cells stratified closest to the GCL and exhibited a small, but densely-packed axon terminal. In  
354 several cases, further confirmation was obtained by partially reconstructing the post-synaptic ON  
355 midget RGC. Giant bipolar cell axon terminals had sparse branches covering a large area. The  
356 distinction between DB4 and DB5 bipolar cells was more subtle as the two costratify and have  
357 similar dendritic fields. The branches of DB5 bipolar cell axon terminals were generally smaller,  
358 denser and exhibited more varicosities than those of DB4 bipolar cells. In some cases, additional  
359 verification was obtained by reconstructing the ON-OFF lateral amacrine cells previously reported  
360 to form reciprocal synapses with DB4, but not DB5, bipolar cells<sup>57</sup>.

361  
362 **Analysis.** All analyses on the serial EM data were performed with open source connectomics  
363 toolbox, SBFSEM-tools (RRID: SCR\_005986, <https://github.com/neitzlab/sbfsem-tools>), in  
364 MATLAB (Mathworks). The Rayleigh test from the CircStat toolbox for MATLAB was used to  
365 determine whether the distribution of dendritic angles was uniform or not<sup>60</sup>. In all other cases, the  
366 Wilcoxon rank sum test was used to determine statistical significance. The box plots in **Fig. 1d**  
367 and **2c** show the maximum, 75<sup>th</sup> percentile, median, 25<sup>th</sup> percentile and minimum values.

368 Stratification depth within in the inner plexiform layer (IPL) was calculated as previously  
369 described<sup>56</sup>. Briefly, markers were placed throughout the volume at the borders between the INL-  
370 IPL and IPL-GCL. The final INL-IPL and GCL-IPL boundaries were determined by surfaces fit to  
371 the X, Y and Z coordinates of the markers denoting each boundary type using bicubic  
372 interpolation. Given an annotation’s X and Y coordinates, the surfaces returned the Z-coordinates  
373 of both IPL boundaries at that X, Y location. The annotation’s Z coordinate relative to the Z  
374 coordinates of each boundary could then be calculated to determine percent IPL depth. In this

375 way, IPL depth was calculated for each annotation individually to account for local variations in  
376 IPL thickness and the volume's slope due to its proximity to the edge of the fovea. The accuracy  
377 of this approach is supported by the strong correspondence between the stratification of ON SACs  
378 within our volume and values previously reported in the literature<sup>58,59</sup>. For **Fig. 1b** and **3d**, the Z  
379 position of each annotation was corrected by normalizing for local IPL variations and translating  
380 by the local offset calculated from the INL-IPL and GCL-IPL boundary surfaces.

381 The radial distance of synapses from each SAC's soma in **Fig. 1d** and **2c** was calculated  
382 as the 2D Euclidean distance. Because each SAC was monostratified, the 2D distance was used  
383 rather than the 3D distance to avoid introducing artifacts associated with the slope of the volume  
384 discussed above. The soma location was automatically chosen as the center of the largest  
385 annotation in each SAC. For synapses annotated across multiple sections, the midpoint  
386 annotation was used.

387  
388 **Visualization.** The 3D rendering was performed with SBFSEM-tools, as previously described<sup>20</sup>.  
389 Briefly, the 3D models are triangle meshes built by rendering segments of connected annotations  
390 as rotated cylinders centered at each annotations' XYZ coordinates and scaled by their radii. The  
391 exception was the detailed reconstructions in **Fig. 3b** and **S3a**, which were rendered with  
392 TrakEM2 instead. Where applicable, RGC axons were omitted to emphasize the dendritic field  
393 structure. Figures were prepared in either MATLAB, ImageJ or Igor Pro 8 (RRID:SCR\_000325,  
394 Wavemetrics) and final layouts were arranged in Adobe Illustrator.

395  
396 **Retrograde tracer injections.** This experiment was performed on a 15.1 kg adult rhesus monkey  
397 (*Macaca mulatta*). The NOT-DTN was approached through a chamber targeting the superior  
398 colliculus. The chamber was tilted to the left by 20° and aimed at a point in the midline, 9 mm  
399 dorsal and 2 mm anterior to stereotaxic zero. The NOT-DTN was identified physiologically by  
400 recording from neurons tuned to horizontal pursuit in specific directions (**Fig. 4a**)<sup>44</sup>. Additionally,  
401 the following omnidirectional pause neurons (FOPNs) previously reported to be located dorsal to  
402 the directionally-selective neurons of the NOT-DTN were identified while approaching the injection  
403 site from the foveal superior colliculus (**Fig. S4a**)<sup>61</sup>. The locations of the directionally-selective  
404 neurons and FOPNs were used to map the boundaries of the NOT-DTN prior to the injection.

405 5% biotinylated dextran-conjugated tetramethyl rhodamine 3000 MW (micro ruby, #D-  
406 7162; Molecular Probes, Eugene, OR) in distilled water<sup>47</sup>. Three injections of 250 nL, 480 nL and  
407 560 nL were made distanced ~300 μm apart. The first injection site was where the first FOPN  
408 was encountered and the final injection site was where background activity corresponding to  
409 smooth pursuit was heard.

410 To visualize the rhodamine fluorescence marking the NOT-DTN injection site, the brain  
411 was fixed by perfusing the animal with 4% paraformaldehyde in 0.1 M phosphate buffer. After the  
412 brain was removed from the skull, it was brought up in 30% sucrose in 0.1 M phosphate buffer.  
413 The injected rhodamine dextran could be seen in the fixed brain as bright pink and the surrounding  
414 thalamus and midbrain were cryosectioned.

415  
416 **Cell fills.** Retinal tissue was prepared as previously described<sup>62</sup>. Briefly, enucleated eyes were  
417 hemisected and the vitreous humor was removed mechanically. When necessary, the eye cup  
418 was treated for ~15 minutes with human plasmin (~50 μg/mL, Sigma or Haematologic  
419 Technologies) to aid vitreous removal. Small pieces of the retinal tissue were detached from the

420 retinal pigment epithelium and placed onto the stage of an electrophysiology rig ganglion cell side  
421 up. The tissue was superfused with warmed (32-35°C) Ames' medium (Sigma). All cell bodies  
422 were visualized with a 60x objective under infrared illumination. RGCs retrogradely labeled with  
423 rhodamine dextran were identified with either one- or two-photon microscopes, then filled with two  
424 fluorescent dyes: Alexa-488 to image immediately and Lucifer Yellow for imaging after  
425 immunohistochemistry. Afterwards, the retinal tissue was detached from the retinal pigment  
426 epithelium if necessary and immersion-fixed in 4% paraformaldehyde in 0.1M phosphate buffer  
427 (PB), pH 7.4, for 30 minutes at room temperature, then washed in PB.

428  
429 ***Immunohistochemistry and confocal microscopy.*** Retinal tissue and brain sections were  
430 mounted on glass slides using DAPI Fluoromount-G (SouthernBiotech, 0100-20). Confocal Z-  
431 stacks of the rhodamine dextran in retrogradely-labeled RGCs, Lucifer Yellow-filled RGCs and  
432 DAPI-labeled nuclei were taken with a Leica TCS SB8 microscope. A 20x oil-immersion objective  
433 was used for retinal tissue and a 10x objective for brain slices. For final figure display, ImageJ  
434 was used to convert Z-stacks to maximum intensity Z-projections and, in some cases, remove  
435 shot noise with the "despeckle" function. The dendritic field in **Fig. 4d** was traced from the original  
436 highest resolution Z-stack, using the Simple Neurite Tracer ImageJ plugin<sup>63</sup>.

437  
438 ***Data and Code Availability.*** The Viking software for visualizing the dataset and the annotations  
439 is freely available (<https://connectomes.utah.edu>). The SBFSEM-tools software used to analyze  
440 and render the annotations is open source (<https://github.com/neitzlab/sbfsem-tools>). All data  
441 generated and/or analyzed during the current study are available from the corresponding author  
442 on reasonable request.



## 443 References

- 444 1. Borst, A. & Helmstaedter, M. Common circuit design in fly and mammalian motion vision.  
445 *Nat. Neurosci.* **18**, 1067–1076 (2015).
- 446 2. Mauss, A. S., Vlasits, A., Borst, A. & Feller, M. Visual circuits for direction selectivity.  
447 *Annu. Rev. Neurosci.* **40**, 211–230 (2017).
- 448 3. Briggman, K. L., Helmstaedter, M. & Denk, W. Wiring specificity in the direction-selectivity  
449 circuit of the retina. *Nature* **471**, 183–188 (2011).
- 450 4. Yonehara, K. *et al.* Spatially asymmetric reorganization of inhibition establishes a motion-  
451 sensitive circuit. *Nature* **469**, 407–410 (2011).
- 452 5. Rodieck, R. W. Starburst amacrine cells of the primate retina. *J. Comp. Neurol.* **285**, 18–  
453 37 (1989).
- 454 6. Wei, W. Neural mechanisms of motion processing in the mammalian retina. *Annu. Rev.*  
455 *Vis. Sci.* **4**, 165–192 (2018).
- 456 7. Oyster, C. W., Takahashi, E. & Collewijn, H. Direction-selective retinal ganglion cells and  
457 control of optokinetic nystagmus in the rabbit. *Vision Res.* **12**, 183–193 (1972).
- 458 8. Dhande, O. S. *et al.* Genetic dissection of retinal inputs to brainstem nuclei controlling  
459 image stabilization. *J. Neurosci.* **33**, 17797–17813 (2013).
- 460 9. Barlow, H. B., Hill, R. M. & Levick, W. R. Retinal ganglion cells responding selectively to  
461 direction and speed of image motion in the rabbit. *J. Physiol.* **173**, 377–407 (1964).
- 462 10. Sabbah, S. *et al.* A retinal code for motion along the gravitational and body axes. *Nature*  
463 **546**, 492–497 (2017).
- 464 11. Yoshida, K. *et al.* A key role for starburst amacrine cells in originating retinal direction  
465 selectivity and optokinetic eye movements. *Neuron* **30**, 771–780 (2001).
- 466 12. Euler, T., Detwiler, P. B. & Denk, W. Directionally selective calcium signals in dendrites of  
467 starburst amacrine cells. *Nature* **418**, 845–852 (2002).
- 468 13. Yonehara, K. *et al.* Congenital nystagmus gene FRMD7 is necessary for establishing a  
469 neuronal circuit asymmetry for direction selectivity. *Neuron* **89**, 177–193 (2016).
- 470 14. Winkelman, B. H. J. *et al.* Nystagmus in patients with congenital stationary night  
471 blindness (CSNB) originates from synchronously firing retinal ganglion cells. *PLOS Biol.*  
472 **17**, e3000174 (2019).
- 473 15. Distler, C. & Hoffmann, K. P. Visual pathway for the optokinetic reflex in infant macaque  
474 monkeys. *J. Neurosci.* **31**, 17659–17668 (2011).
- 475 16. Baden, T., Euler, T. & Berens, P. Understanding the retinal basis of vision across  
476 species. *Nat. Rev. Neurosci.* **21**, 5–20 (2020).
- 477 17. Lettvin, J. Y., Maturana, H. R., McCulloch, W. S. & Pitts, W. H. What the frog’s eye tells  
478 the frog’s brain. *Proc. IRE* **47**, 1940–1951 (1959).
- 479 18. Dacey, D. M. Origins of perception: retinal ganglion cell diversity and the creation of  
480 parallel visual pathways. in *The Cognitive Neurosciences* (ed. Gazzaniga, M. S.) 281–  
481 301 (MIT Press, 2004).
- 482 19. Denk, W., Briggman, K. L. & Helmstaedter, M. Structural neurobiology: missing link to a  
483 mechanistic understanding of neural computation. *Nat. Rev. Neurosci.* **13**, 351–358  
484 (2012).
- 485 20. Patterson, S. S., Kuchenbecker, J. A., Anderson, J. R., Neitz, M. & Neitz, J. A color vision  
486 circuit for non-image-forming vision in the primate retina. *Curr. Biol.* **30**, 1269–1274  
487 (2020).
- 488 21. Yamada, E. S. *et al.* Synaptic connections of starburst amacrine cells and localization of  
489 acetylcholine receptors in primate retinas. *J. Comp. Neurol.* **461**, 76–90 (2003).
- 490 22. Ding, H., Smith, R. G., Poleg-Polsky, A., Diamond, J. S. & Briggman, K. L. Species-

- 491 specific wiring for direction selectivity in the mammalian retina. *Nature* **535**, 105–110  
492 (2016).
- 493 23. Vlasits, A. L. *et al.* A role for synaptic input distribution in a dendritic computation of  
494 motion direction in the retina. *Neuron* **89**, 1317–1330 (2016).
- 495 24. Kim, J. S. *et al.* Space–time wiring specificity supports direction selectivity in the retina.  
496 *Nature* **509**, 331–336 (2014).
- 497 25. Fransen, J. W. & Borghuis, B. G. Temporally diverse excitation generates direction-  
498 selective responses in ON- and OFF-type retinal starburst amacrine cells. *Cell Rep.* **18**,  
499 1356–1365 (2017).
- 500 26. Lee, S. & Zhou, Z. J. The synaptic mechanism of direction selectivity in distal processes  
501 of starburst amacrine cells. *Neuron* **51**, 787–799 (2006).
- 502 27. Münch, T. A. & Werblin, F. S. Symmetric interactions within a homogeneous starburst cell  
503 network can lead to robust asymmetries in dendrites of starburst amacrine cells. *J.*  
504 *Neurophysiol.* **96**, 471–477 (2006).
- 505 28. Wässle, H., Grünert, U., Röhrenbeck, J. & Boycott, B. B. Cortical magnification factor and  
506 the ganglion cell density of the primate retina. *Nature* **341**, 643–645 (1998).
- 507 29. Puthussery, T., Venkataramani, S., Gayet-Primo, J., Smith, R. G. & Taylor, W. R. NaV1.1  
508 channels in axon initial segments of bipolar cells augment input to magnocellular visual  
509 pathways in the primate retina. *J. Neurosci.* **33**, 16045–16059 (2013).
- 510 30. Famiglietti, E. V. Synaptic organization of starburst amacrine cells in rabbit retina:  
511 Analysis of serial thin sections by electron microscopy and graphic reconstruction. *J.*  
512 *Comp. Neurol.* **309**, 40–70 (1991).
- 513 31. Sethuramanujam, S. *et al.* Rapid multi-directed cholinergic transmission in the central  
514 nervous system. *Nat. Commun.* **12**, 1374 (2021).
- 515 32. Masri, R. A., Percival, K. A., Koizumi, A., Martin, P. R. & Grünert, U. Survey of retinal  
516 ganglion cell morphology in marmoset. *J. Comp. Neurol.* **527**, 236–258 (2019).
- 517 33. Kanjhan, R. & Sivyer, B. Two types of ON direction-selective ganglion cells in rabbit  
518 retina. *Neurosci. Lett.* **483**, 105–109 (2010).
- 519 34. Pushchin, I. I. Retinal ganglion cells of the accessory optic system: a review. *J. Integr.*  
520 *Neurosci.* **12**, 145–162 (2013).
- 521 35. Oyster, C. W., Simpson, J. I., Takahashi, E. S. & Soodak, R. E. Retinal ganglion cells  
522 projecting to the rabbit accessory optic system. *J. Comp. Neurol.* **190**, 49–61 (1980).
- 523 36. Dong, W., Sun, W., Zhang, Y., Chen, X. & He, S. Dendritic relationship between starburst  
524 amacrine cells and direction-selective ganglion cells in the rabbit retina. *J. Physiol.* **556**,  
525 11–17 (2004).
- 526 37. Sun, W., Deng, Q., Levick, W. R. & He, S. ON direction-selective ganglion cells in the  
527 mouse retina. *J. Physiol.* **576**, 197–202 (2006).
- 528 38. Matsumoto, A., Briggman, K. L. & Yonehara, K. Spatiotemporally asymmetric excitation  
529 supports mammalian retinal motion sensitivity. *Curr. Biol.* **29**, 3277–3288 (2019).
- 530 39. Bae, J. A. *et al.* Digital museum of retinal ganglion cells with dense anatomy and  
531 physiology resource. *Cell* **173**, 1293–1306 (2018).
- 532 40. He, S. & Masland, R. H. ON direction-selective ganglion cells in the rabbit retina: dendritic  
533 morphology and pattern of fasciculation. *Vis. Neurosci.* **15**, 369–375 (1998).
- 534 41. Land, M. Eye movements in man and other animals. *Vision Res.* **162**, 1–7 (2019).
- 535 42. Simpson, J. I. The accessory optic system. *Annu. Rev. Neurosci.* **7**, 13–41 (1984).
- 536 43. Oyster, C. W. The analysis of image motion by the rabbit retina. *J. Physiol.* **199**, 613–635  
537 (1968).
- 538 44. Mustari, M. J. & Fuchs, A. F. Discharge patterns of neurons in the pretectal nucleus of the  
539 optic tract (NOT) in the behaving primate. *J. Neurophysiol.* **64**, 77–90 (1990).

- 540 45. Cooper, H. M. & Magnin, M. A common mammalian plan of accessory optic system  
541 organization revealed in all primates. *Nature* **324**, 457–459 (1986).  
542 46. Telkes, I., Distler, C. & Hoffmann, K. P. Retinal ganglion cells projecting to the nucleus of  
543 the optic tract and the dorsal terminal nucleus of the accessory optic system in macaque  
544 monkeys. *Eur. J. Neurosci.* **12**, 2367–2375 (2000).  
545 47. Dacey, D. M., Peterson, B. B., Robinson, F. R. & Gamlin, P. D. Fireworks in the primate  
546 retina: in vitro photodynamics reveals diverse LGN-projecting ganglion cell types. *Neuron*  
547 **37**, 15–27 (2003).  
548 48. Jiang, L. *et al.* FRMD7 mutations disrupt the interaction with GABRA2 and may result in  
549 infantile nystagmus syndrome. *Investig. Ophthalmol. Vis. Sci.* **61**, 1–10 (2020).  
550 49. Helmstaedter, M. *et al.* Connectomic reconstruction of the inner plexiform layer in the  
551 mouse retina. *Nature* **500**, 168–174 (2013).  
552 50. Salzman, C. D., Britten, K. H. & Newsome, W. T. Cortical microstimulation influences  
553 perceptual judgements of motion direction. *Nature* **346**, 174–177 (1990).  
554

### 555 **Methods References**

- 556 51. Della Santina, L. *et al.* Glutamatergic monopolar interneurons provide a novel pathway of  
557 excitation in the mouse retina. *Curr. Biol.* **26**, 2070–2077 (2016).  
558 52. Patterson, S. S. *et al.* An S-cone circuit for edge detection in the primate retina. *Sci. Rep.*  
559 **9**, 11913 (2019).  
560 53. Anderson, J. R. *et al.* The Viking viewer for connectomics: Scalable multi-user annotation  
561 and summarization of large volume data sets. *J. Microsc.* **241**, 13–28 (2011).  
562 54. Dowling, J. E. & Boycott, B. B. Organization of the primate retina: Electron microscopy.  
563 *Proc. R. Soc. London. Ser. B* **166**, 80–111 (1966).  
564 55. Cardona, A. *et al.* TrakEM2 software for neural circuit reconstruction. *PLoS One* **7**,  
565 e38011 (2012).  
566 56. Patterson, S. S. *et al.* Wide-field amacrine cell inputs to ON parasol ganglion cells in  
567 macaque retina. *J. Comp. Neurol.* **528**, 1588–1598 (2019).  
568 57. Tsukamoto, Y. & Omi, N. ON bipolar cells in macaque retina: Type-specific synaptic  
569 connectivity with special reference to OFF counterparts. *Front. Neuroanat.* **10**, 104  
570 (2016).  
571 58. Rodieck, R. W. & Marshak, D. W. Spatial density and distribution of choline  
572 acetyltransferase immunoreactive cells in human, macaque, and baboon retinas. *J.*  
573 *Comp. Neurol.* **321**, 46–64 (1992).  
574 59. Sümbül, U. *et al.* A genetic and computational approach to structurally classify neuronal  
575 types. *Nat. Commun.* **5**, 3512 (2014).  
576 60. Berens, P. CircStat: A MATLAB Toolbox for Circular Statistics. *J. Stat. Softw.* **31**, (2009).  
577 61. Mustari, M. J., Fuchs, A. F. & Pong, M. Response properties of pretectal omnidirectional  
578 pause neurons in the behaving primate. *J. Neurophysiol.* **77**, 116–125 (1997).  
579 62. Turner, M. H. & Rieke, F. Synaptic rectification controls nonlinear spatial integration of  
580 natural visual inputs. *Neuron* **90**, 1257–1271 (2016).  
581 63. Longair, M. H., Baker, D. A. & Armstrong, J. D. Simple neurite tracer: Open source  
582 software for reconstruction, visualization and analysis of neuronal processes.  
583 *Bioinformatics* **27**, 2453–2454 (2011).
